# Supplementary material for: Inkjet printing and rapid ebeam sintering enable formation of highly conductive patterns in roll to roll process
Source: Royal Society of Chemistry journal article supplement (doi:10.1039/c7ra00967d), 2017-01-01
Supplement: c7ra00967d1.pdf [file c7ra00967d1.pdf]

## Supporting Information

Inkjet printing and rapid ebeam sintering enable  
formation of highly conductive patterns in roll to roll  
process

Y. Farraj,<sup>a</sup> M. Biemann<sup>b</sup> and S. Magdassi<sup>a</sup>

<sup>a</sup>Casali Center of Applied Chemistry, Institute of Chemistry, The Hebrew  
University of Jerusalem, Jerusalem, 91904, Israel

<sup>b</sup>ebeam Technologies, COMET Group, Flamatt, 3175, Switzerland

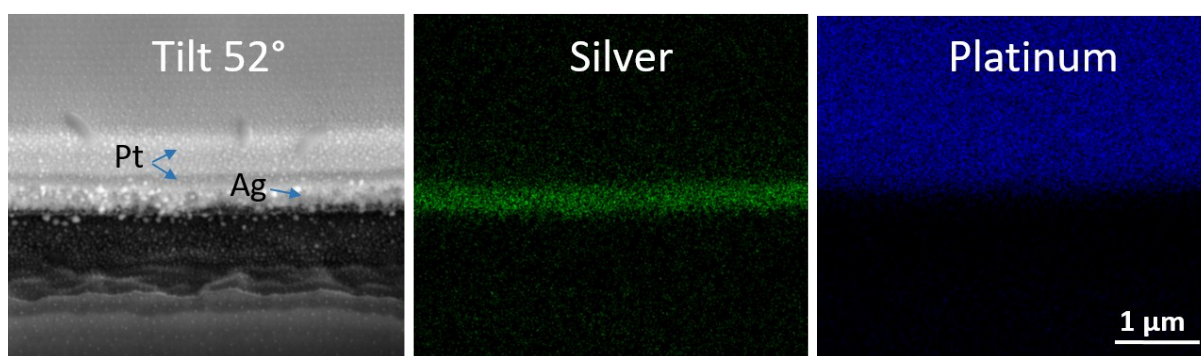

Fig. S1 SEM and EDS mapping for the pattern cross section indicating the existence of silver and platinum.

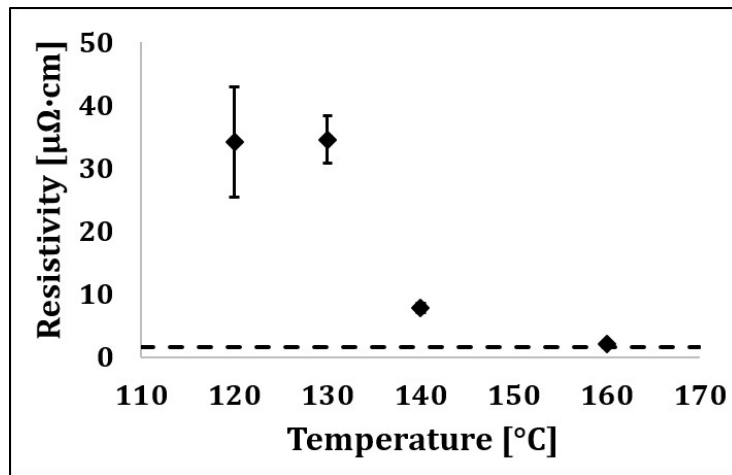

Fig. S2 Resistivity of silver tracks thermally sintered at various temperatures. Dashed line belongs to silver bulk resistivity.

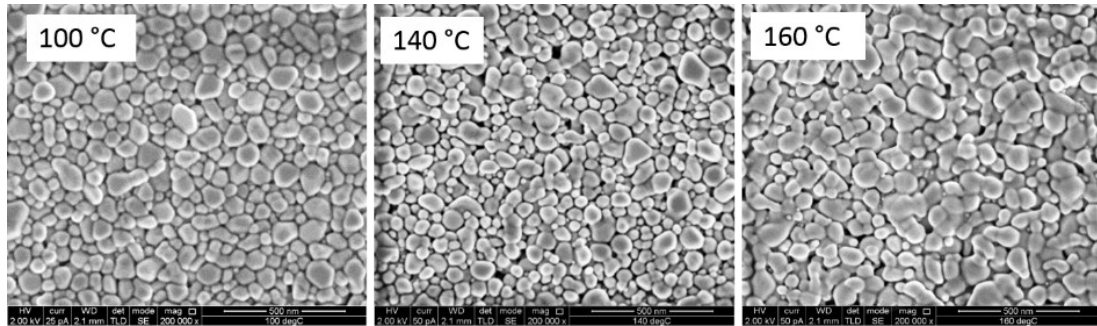

Fig. S3 SEM images of silver tracks after sintering at 100, 140, and 160 °C.
